# Supplementary material for: Silver nanoparticles decorated filter paper via self-sacrificing reduction for membrane extraction surface-enhanced Raman spectroscopy detection
Source: Royal Society of Chemistry journal article supplement (doi:10.1039/c3an36485b), 2013-01-01
Supplement: c3an36485b.pdf [file c3an36485b.pdf]

## Electronic Supplementary Information for

### Silver nanoparticles decorated filter paper via self-sacrificing reduction for membrane extraction surface-enhanced Raman spectroscopy detection

Yanjing Meng, Yongchao Lai, Xiaohong Jiang, Quanqin Zhao and Jinhua Zhan \*

Key Laboratory of Colloid and Interface Chemistry, Ministry of Education, Department of Chemistry, Shandong University, Jinan 250100, China

\*Address for correspondence. Email: jhzhan@sdu.edu.cn

Phone: 86-531-88365017; Fax: 86-531-8836628

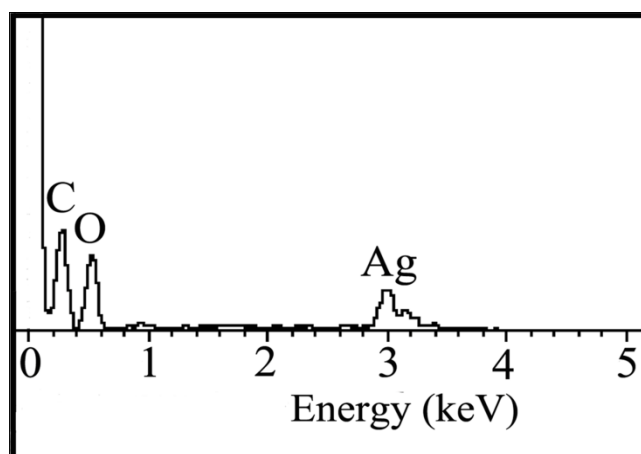

Fig. S1 EDS of reacted filter paper.

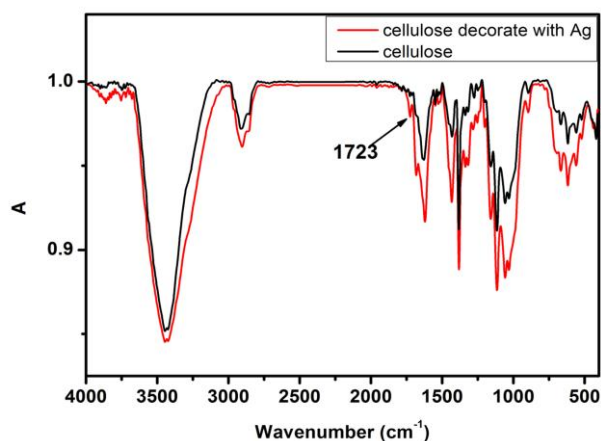

Figure S2. IR of raw and reacted filter paper.

Table S1. Elemental analysis of three points selected randomly on the reacted paper.

| Element | Weight percent | atom percent |
|---------|----------------|--------------|
| C       | 40.08          | 49.53        |
|         | 36.28          | 47.81        |
|         | 37.77          | 48.73        |

|    |       |       |
|----|-------|-------|
| O  | 53.44 | 49.58 |
|    | 50.85 | 50.30 |
|    | 51.31 | 49.70 |
| Ag | 6.48  | 0.89  |
|    | 12.87 | 1.89  |
|    | 10.92 | 1.57  |

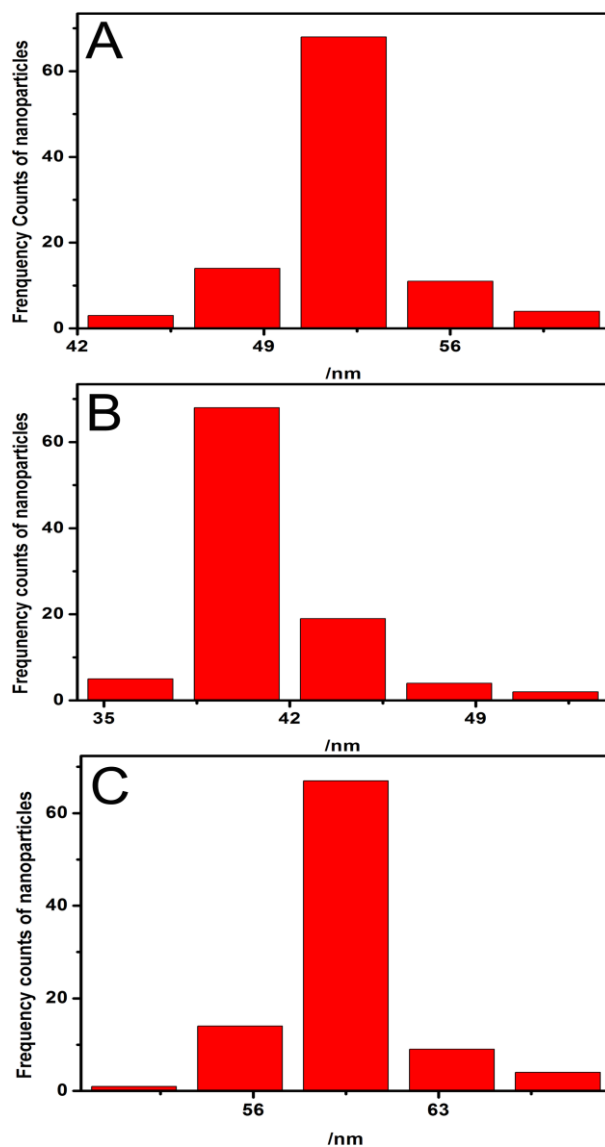

**Fig. S3** Diameter statistics analysis of silver nanoparticles synthesized by 1 mM  $\text{Ag}(\text{NH}_3)_2\text{OH}$  with reaction time of 50min(A) and 8 mM  $\text{Ag}(\text{NH}_3)_2\text{OH}$  with reaction time of (B) 10 min, (C) 50 min.

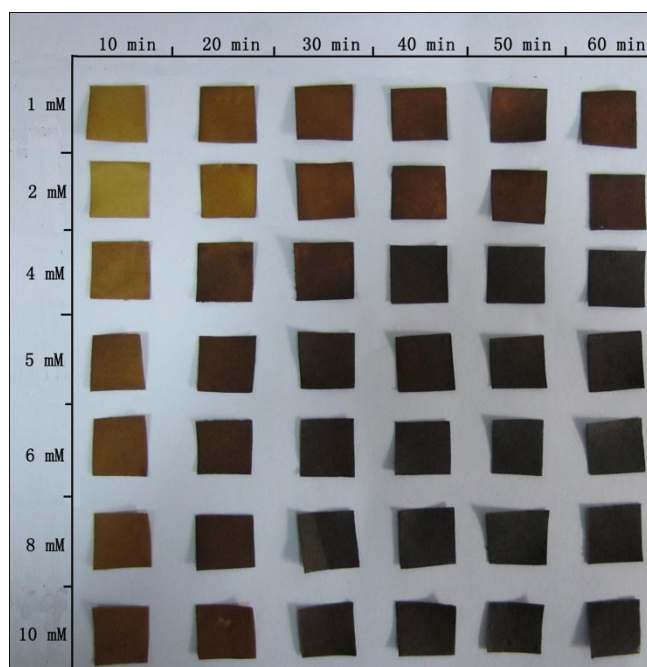

**Fig. S4** image of filter paper synthesized under different concentrations of  $\text{Ag}(\text{NH}_3)_2\text{OH}$  with varied reaction time.

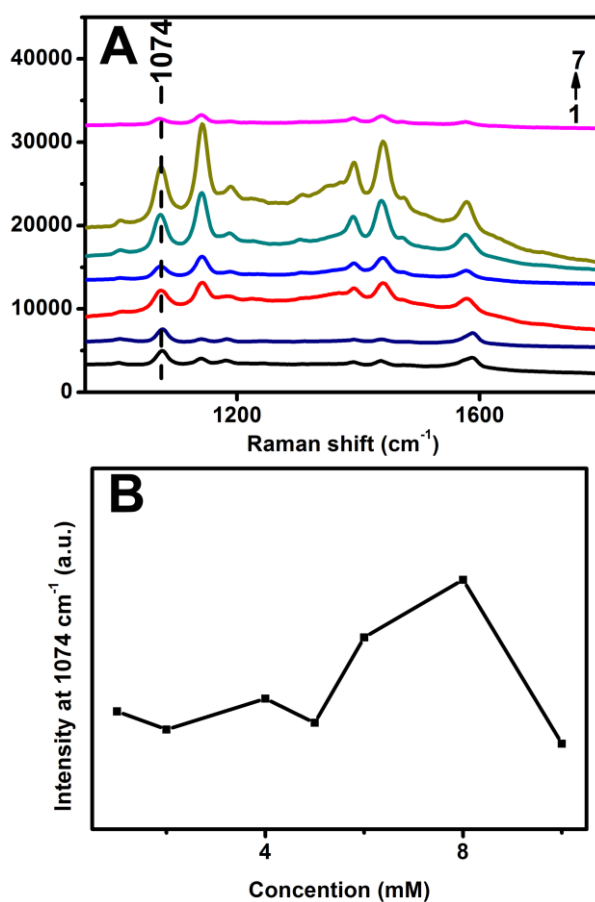

**Fig. S5** (A) Raman spectra of PATP detected on filter paper substrates obtained in 1, 2, 4, 5, 6, 8 and 10 mM  $\text{Ag}(\text{NH}_3)_2\text{OH}$  solution corresponding to 1→7. (B) Diagram of SERS intensities of PATP at  $1076\text{ cm}^{-1}$  versus concentrations of  $\text{Ag}(\text{NH}_3)_2\text{OH}$ .

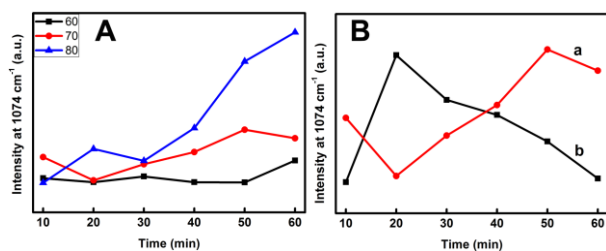

**Fig. S6** (A) SERS signals of PATP at 1074 cm<sup>-1</sup> corresponding to time for substrates reacted at 60 °C, 70 °C and 80 °C. (B) SERS intensity of PATP at 1074 cm<sup>-1</sup> versus time for slow speed filter paper (a) and medium speed filter paper (b).

### The calculation of enhancement factor(EF)

The enhancement factor(EF) was calculated by the following equation:

$$EF = (I_{SERS}/I_{Raman}) \cdot (N_{bulk}/N_{ads})$$

$$N_{ads} = A/A_{sum} \cdot V_{ads} \cdot C_1$$

$$N_{bulk} = A \cdot H_{eff} \cdot C_{sol}$$

$$\begin{aligned} EF &= (I_{SERS}/I_{Raman}) \cdot (A_{eff} \cdot H_{eff} \cdot C_{sol}) / (A_{eff}/A_{sum} \cdot V_{sum} \cdot C_1) \\ &= (I_{SERS}/I_{Raman}) \cdot (A_{sum} \cdot H_{eff} \cdot C_{sol}) / (V_{ads} \cdot C_1) \\ &= 0.99 M \cdot I_{SERS} / (I_{Raman} \cdot C_1) \end{aligned}$$

$N_{ads}$  is the number of MPY molecules under laser radiation adsorbed on substrate;

$A_{eff}$  is the effective area of spot size;

$A_{sum}$  is the area of the paper substrate, 3 mm×3 mm;

$V_{ads}$  is the volume that is spotted onto the paper substrate, 10 μL;

$C_1$  is the concentration of the solution that is to be measured.

$N_{bulk}$  is the number of MPY molecules in the scattering volume in bulk solution;

$H_{eff}$  is the effective length of of the scattering volume and here was estimated as the depth of field, 2.2 mm;

$C_{sol}$  is 0.5 M MPY solution for the non-SERS measurement.

The detail of the calculation of enhancement factor was enclosed in electronic supplementary information.
